# Supplementary material for: A facile method for detection of alkaline phosphatase activity based on the turn-on fluorescence of resorufin
Source: Royal Society of Chemistry journal article supplement (doi:10.1039/c4ay00634h), 2014-01-01
Supplement: c4ay00634h1.pdf [file c4ay00634h1.pdf]

## Supporting Information

### **A facile method for alkaline phosphatase activity detection based on the turn-on fluorescence of resorufin**

**Fangyuan Wang,<sup>a,b</sup> Yongxin Li,<sup>a</sup> Wenying Li,<sup>a,b</sup> Qingfeng Zhang,<sup>a,b</sup> Jian Chen,<sup>a</sup>**

**Huipeng Zhou,<sup>a</sup> Cong Yu<sup>\*a,b</sup>**

*<sup>a</sup>State Key Laboratory of Electroanalytical Chemistry, Changchun Institute of Applied*

*Chemistry, Chinese Academy of Sciences, Changchun, Jilin, 130022, P. R. China*

*<sup>b</sup>University of Chinese Academy of Sciences, Beijing, 100049, P. R. China*

E-mail: [congyu@ciac.ac.cn](mailto:congyu@ciac.ac.cn)

Fax: (+86)-431-8526-2710

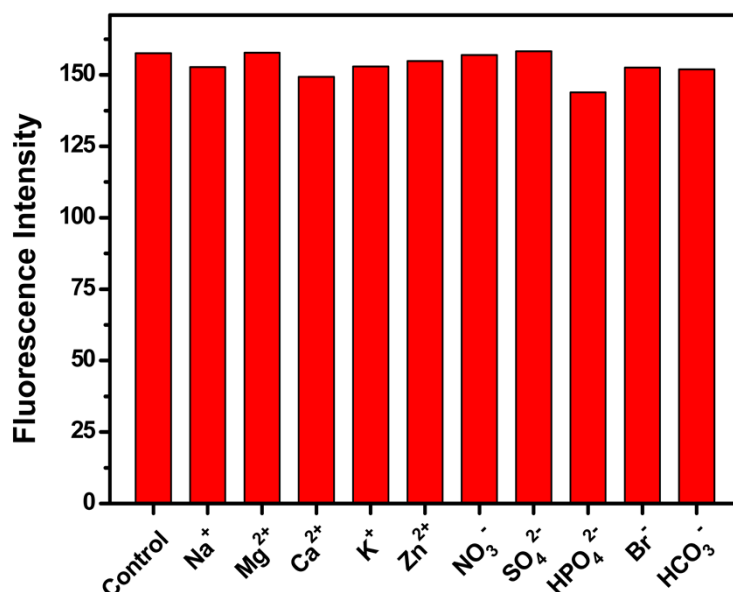

**Fig. S1** Selectivity study. Samples were incubated at 37 °C for 5 hours and the emission intensity of resorufin at 583 nm was recorded. Assay solutions contained 20 μM resazurin, 500 μM AAP, 120 mU/mL ALP, and the metal ions and anions were all at 1 mM concentration. Control: without the additional metal ions or anions.

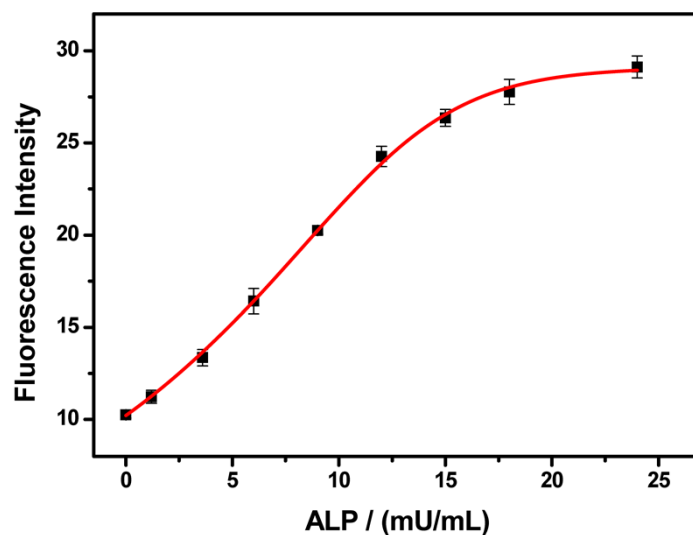

**Fig. S2** Changes in emission intensity at 583 nm against ALP concentration. All samples contained 0.2% fetal bovine serum, 20 μM resazurin, 500 μM AAP, 20 mM Tris-HCl (pH 7.5), and different concentrations of ALP (1.2, 3.6, 6, 9, 12, 15, 18, and 24 mU/mL, respectively). The experiments were repeated three times and the average intensity values were given.

**Table S1** ALP recovery in 0.2% fetal bovine serum samples.

| Samples | Added<br>(mU/mL) | Found<br>(mU/mL) | Recovery<br>(%) | RSD <sup>a</sup><br>(%, n=3) |
|---------|------------------|------------------|-----------------|------------------------------|
| 1       | 1.20             | 1.19 ± 0.05      | 99.2            | 4.2                          |
| 2       | 2.40             | 2.36 ± 0.07      | 98.3            | 2.9                          |
| 3       | 6.00             | 5.87 ± 0.14      | 97.8            | 2.3                          |
| 4       | 12.00            | 12.19 ± 0.23     | 101.6           | 1.9                          |

<sup>a</sup>RSD, relative standard deviation.
